# Supplementary material
Source: MDPI journal article supplement (https://www.mdpi.com/1996-1073/14/23/8157)
Supplement: s1 [file s1]

# Supplementary Materials

Marco20210121\_wMeOH\_filtered-20210929\_NewLabels  
Loadings for PC1 (27.4 %) versus PC2 (21.1 %), Pareto

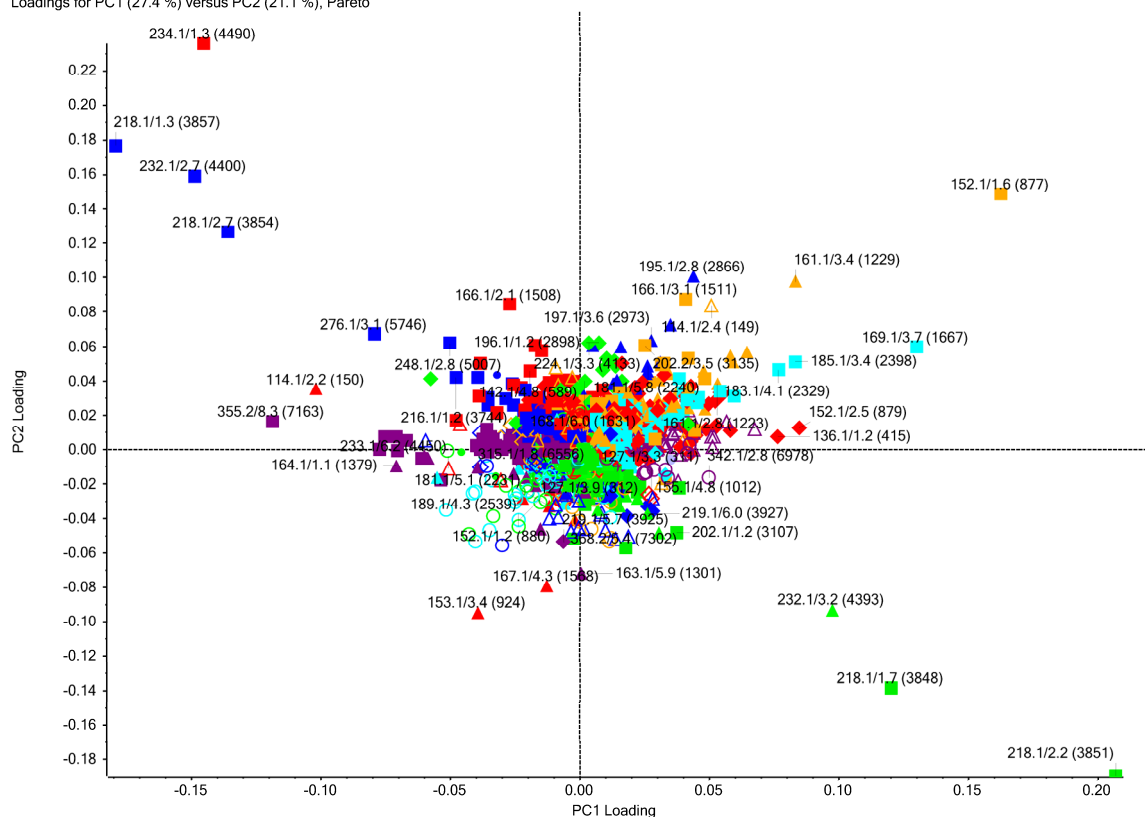

9/29/2021 6:46:30 PM

**Figure S1.** Marco20210121\_wMeOH\_filtered-20210929\_NewLabels Loadings for PC1 (27.4 %) versus PC2 (21.1 %), Pareto.
